# Supplementary material for: Contrast and Raman spectroscopy study of single- and few-layered charge density wave material: 2H-TaSe2
Source: PubMed Central journal article supplement — Sci Rep. 2013 Sep 5;3:2593. doi: 10.1038/srep02593 (PMC3763362; doi:10.1038/srep02593), 2013-09-05
Supplement: srep02593-s1.pdf [file srep02593-s1.pdf]

## Supplementary Information

### Contrast and Raman spectroscopy study of single- and few-layered charge density wave material: 2H-TaSe<sub>2</sub>

Parviz Hajiye<sup>1†</sup>, Chunxiao Cong<sup>2†</sup>, Caiyu Qiu<sup>2</sup>, Ting Yu<sup>1, 2, 3\*</sup>

<sup>1</sup> Graphene Research Centre, National University of Singapore, 117546 Singapore

<sup>2</sup> Division of Physics and Applied Physics, School of Physical and Mathematical Sciences,  
Nanyang Technological University, 637371 Singapore

<sup>3</sup> Department of Physics, Faculty of Science, National University of Singapore, 117542  
Singapore

<sup>†</sup> Equally contributed

\* Address correspondence to [yuting@ntu.edu.sg](mailto:yuting@ntu.edu.sg)

There are 2 figures in this Supplementary Information section.

Supplementary Figures S1 depicts Raman spectra of supported and suspended part of the same 3-layer TaSe<sub>2</sub> sample.

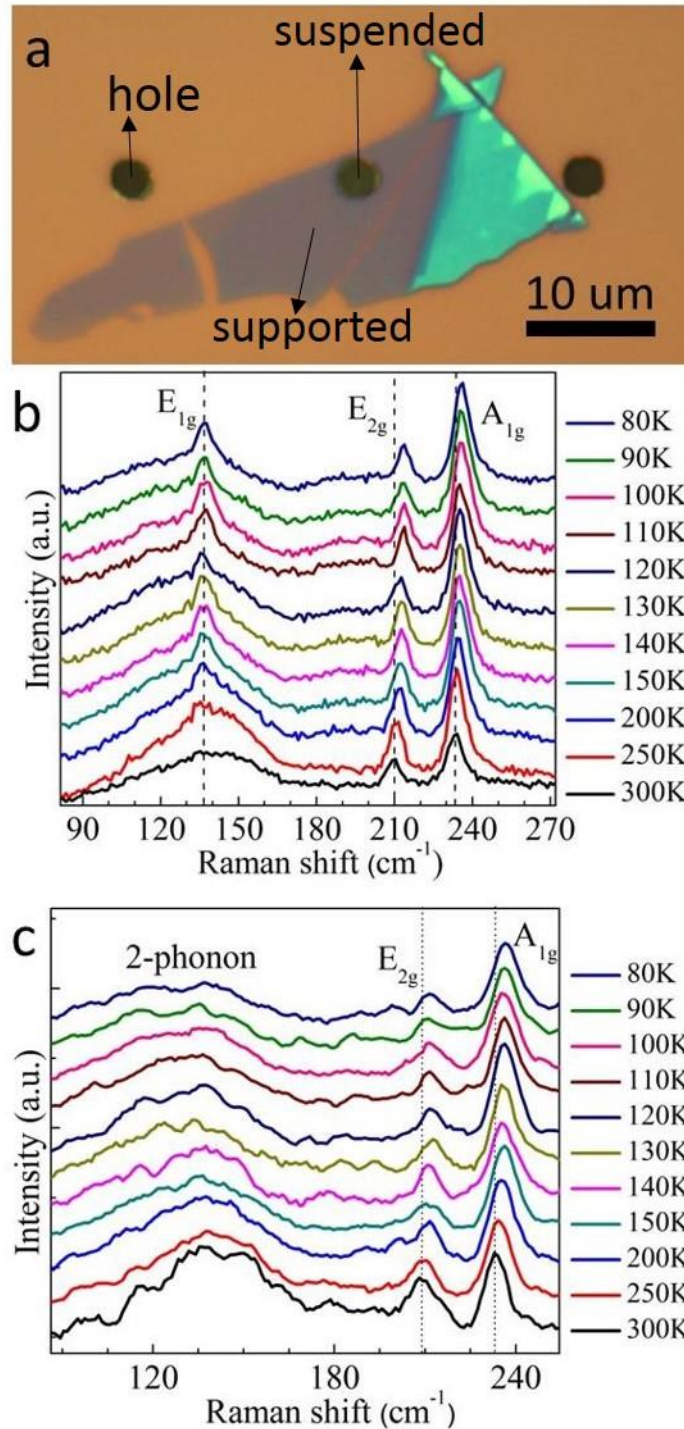

**Supplementary Figure S1 | This graph shows low temperature Raman measurement of suspended and supported 3-layer TaSe<sub>2</sub>.** (a) Optical image of suspended and supported trilayer TaSe<sub>2</sub> (b) Low temperature Raman measurement of 3-layer supported TaSe<sub>2</sub>. (c) Low temperature Raman measurement of 3-layer suspended TaSe<sub>2</sub>.

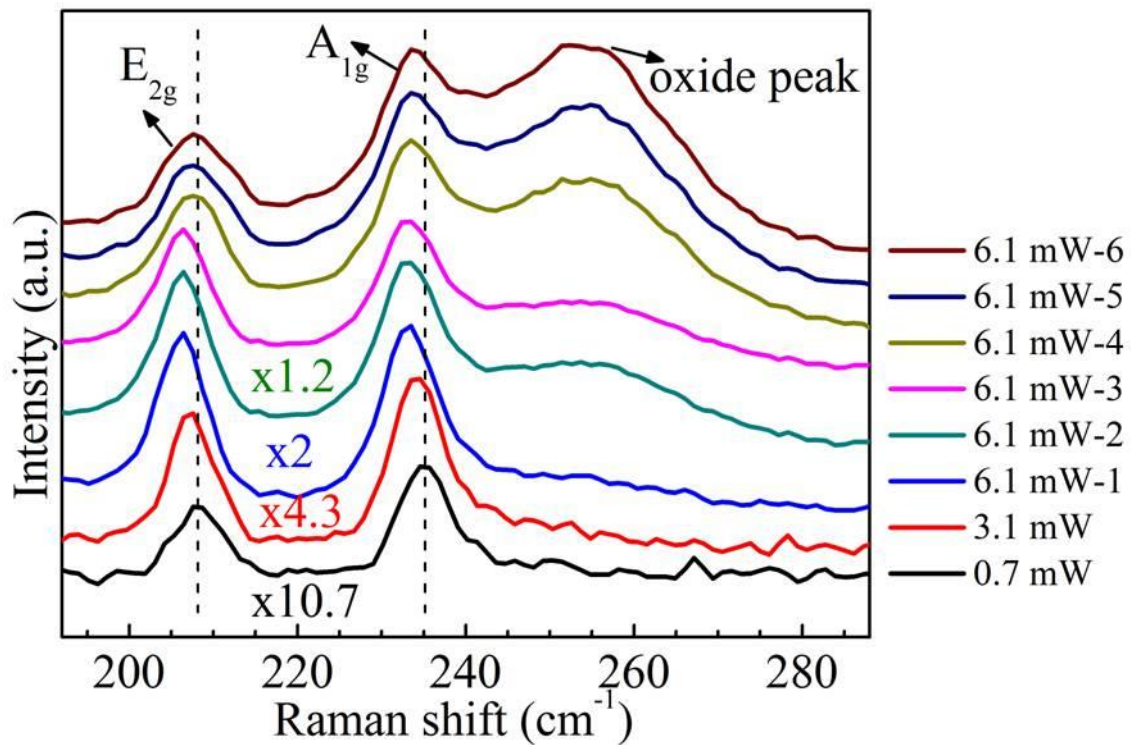

**Supplementary Figure S2 | This graph shows burning stages of bulk TaSe<sub>2</sub>.** Until 3.1 mW laser power, the intensity of the E<sub>2g</sub> peak is roughly ~80% of that of the A<sub>1g</sub> peak. At 6.1 mW (blue line) laser power, it shows the pre-burn stage where the intensity of the E<sub>2g</sub> peak becomes as strong as or even stronger than that of the A<sub>1g</sub> peak. If we repeat the same measurement with same power, we observe emergence of broad oxide peak at around ~255 cm<sup>-1</sup>. Appearance of oxide peak accompanies sample color change due to burning as well. Red-shift due to laser induced local heating can be also observed when power increased from 0.7 mW to 6.1 mW.

Referring to Supplementary Figure S2, we conclude that the E<sub>2g</sub> intensity must be kept lower than that of the A<sub>1g</sub> peak for healthy Raman spectra of TaSe<sub>2</sub> samples. If the E<sub>2g</sub> peak intensity is as strong as or stronger than the A<sub>1g</sub> peak intensity, this must be accepted as an indication of pre-burn stage and laser power must be decreased.
